# Supplementary material for: Regulating Type H Vessel Formation and Bone Metabolism via Bone‐Targeting Oral Micro/Nano‐Hydrogel Microspheres to Prevent Bone Loss
Source: PubMed Central journal article supplement (PMC10214236; doi:10.1002/advs.202207381), 2023-03-26
Supplement: ADVS-10-2207381-s001.pdf [file ADVS-10-2207381-s001.pdf]

## Supporting Information

for *Adv. Sci.*, DOI 10.1002/adv.202207381

Regulating Type H Vessel Formation and Bone Metabolism via Bone-Targeting Oral  
Micro/Nano-Hydrogel Microspheres to Prevent Bone Loss

*Junjie Li, Gang Wei, Gongwen Liu, Yawei Du, Ruizhi Zhang, Aifei Wang, Baoshan Liu, Wenguo Cui\*, Peng Jia\* and Youjia Xu\**

**Supplementary Materials for**  
**Regulating type H vessel formation and bone metabolism via bone-targeted**  
**oral micro/nano hydrogel microspheres to prevent bone loss**

Junjie Li<sup>1,2,4†</sup>, Gang Wei<sup>2†</sup>, Gongwen Liu<sup>3†</sup>, Yawei Du<sup>2</sup>, Ruizhi Zhang<sup>1</sup>, Aifei Wang<sup>1</sup>, Baoshan  
Liu<sup>1</sup>, Wenguo Cui<sup>2\*</sup>, Peng Jia<sup>1\*</sup>, Youjia Xu<sup>1\*</sup>

\*Corresponding author. Email: xuyoujia@suda.edu.cn (Y.X.); jiapengorthop@163.com (P.J.);  
wgcu80@hotmail.com (W.C.)

**This PDF file includes:**

Figs. S1 to S14

Tables S1

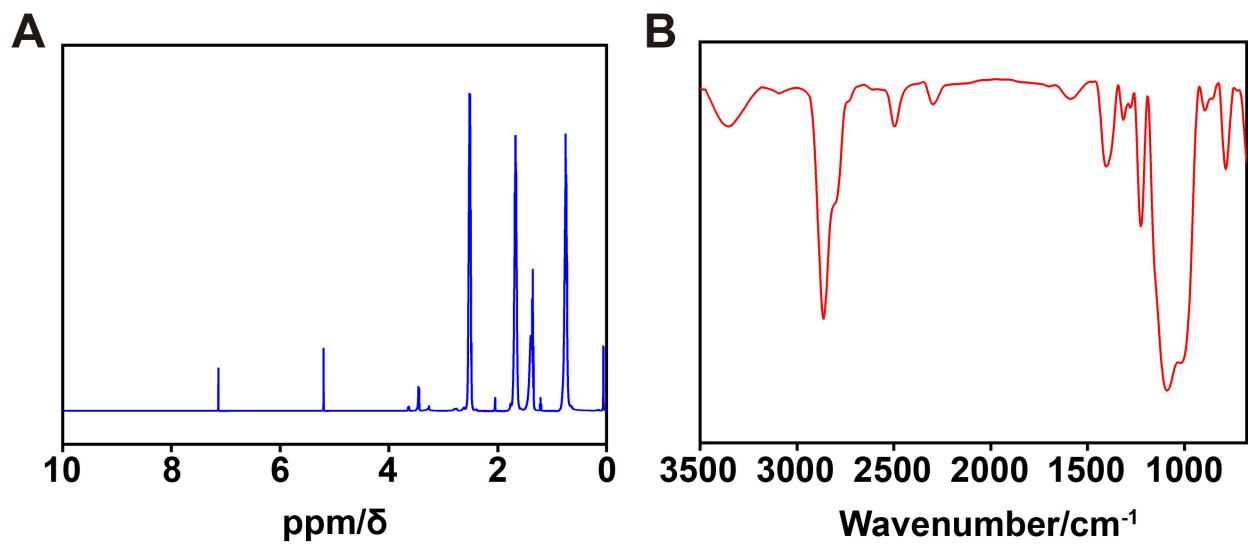

**Fig. S1.** Characteristics of POSS-SH. (A)  $^1\text{H}$  NMR spectra of POSS-SH. (B) FTIR spectra of POSS-SH.

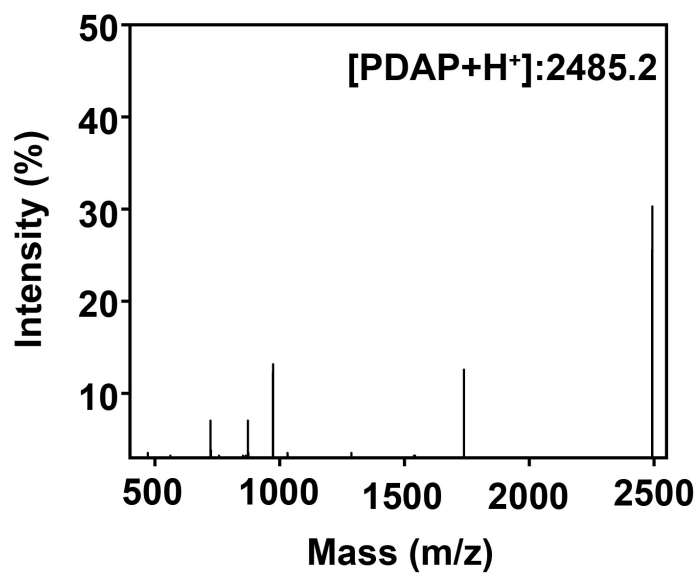

**Fig. S2.** Molecular weight of PDAP NPs determined by MALDI-TOF.

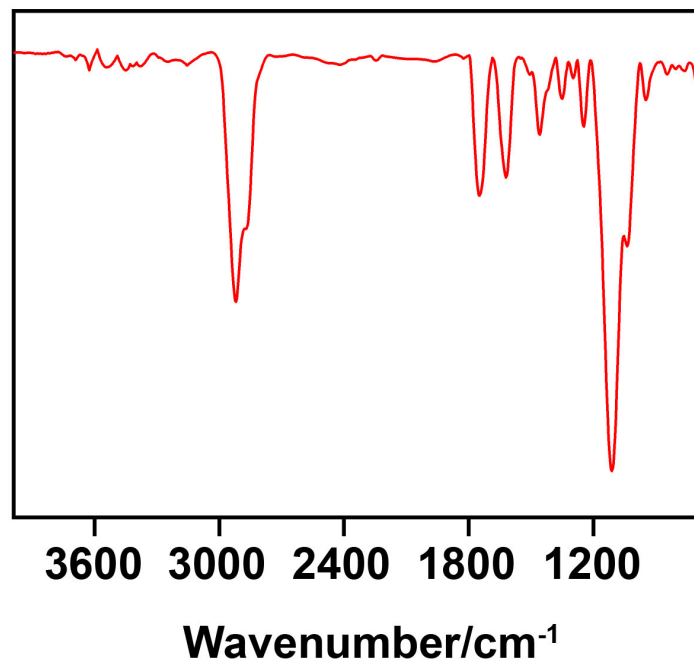

**Fig. S3.** FTIR spectra of PDAP NPs.

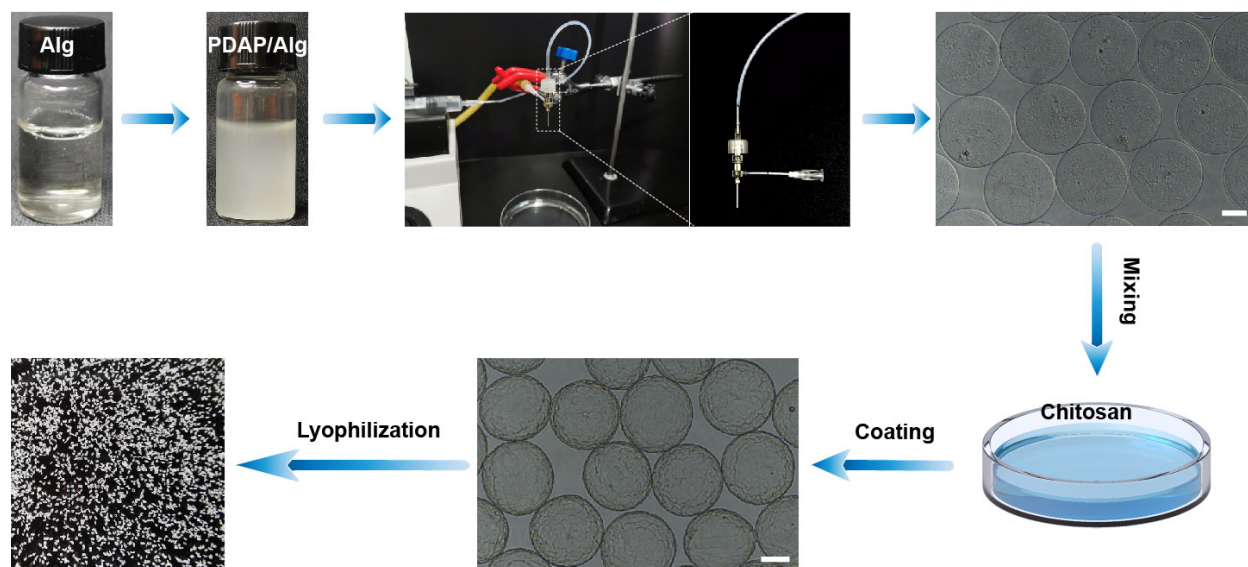

**Fig. S4.** Preparation process of PDAP@Alg/Cs microspheres *via* gas microfluidic and ionic cross-linking techniques. Scale bars, 100  $\mu\text{m}$ .

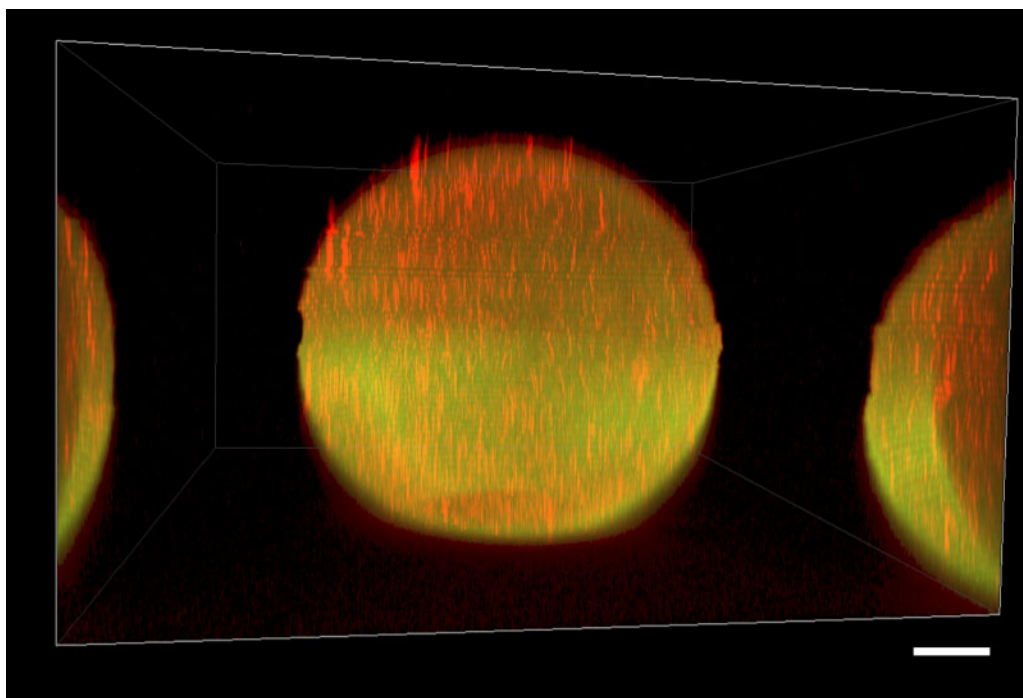

**Fig. S5.** CLSM 3D image of the shell-core structure of Alg/Cs microspheres. Scale bars, 50  $\mu\text{m}$ .

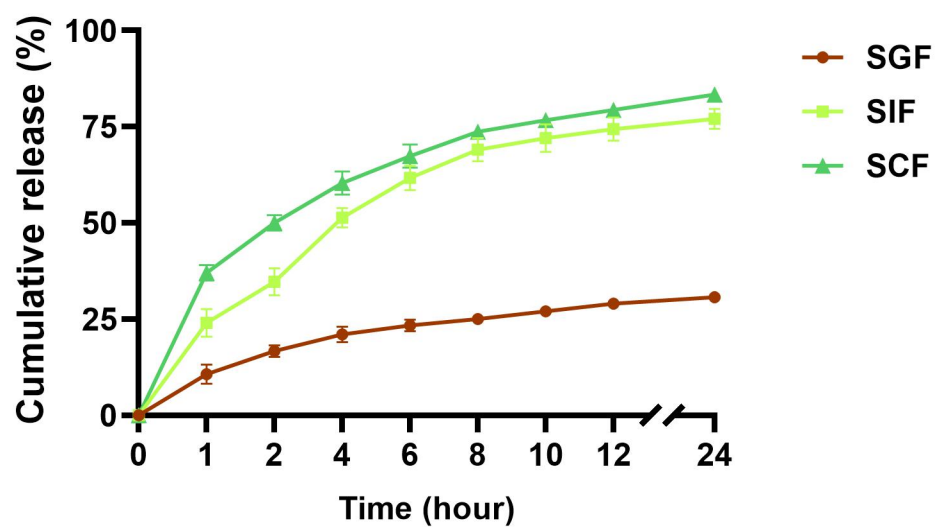

**Fig. S6.** 24 h release curves of PDAP NPs from PDAP@Alg/Cs microspheres in SGF, SIF, and SCF.



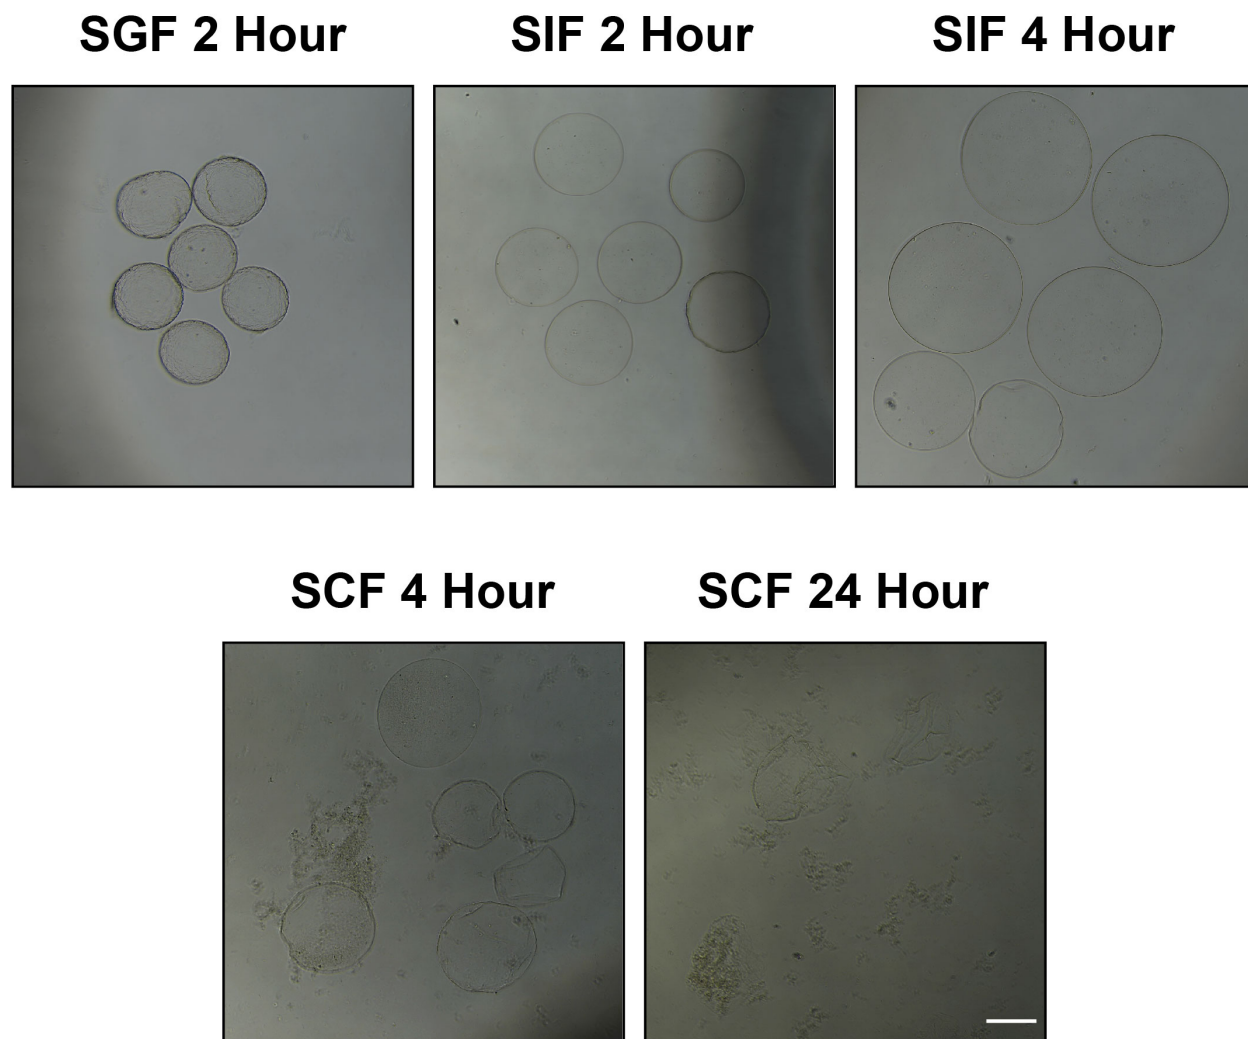

**Fig. S7.** Optical microscopy images of morphological change of the PDAP@Alg/Cs microspheres in SGF, SIF, and SCF. Scale bars, 200  $\mu\text{m}$ .

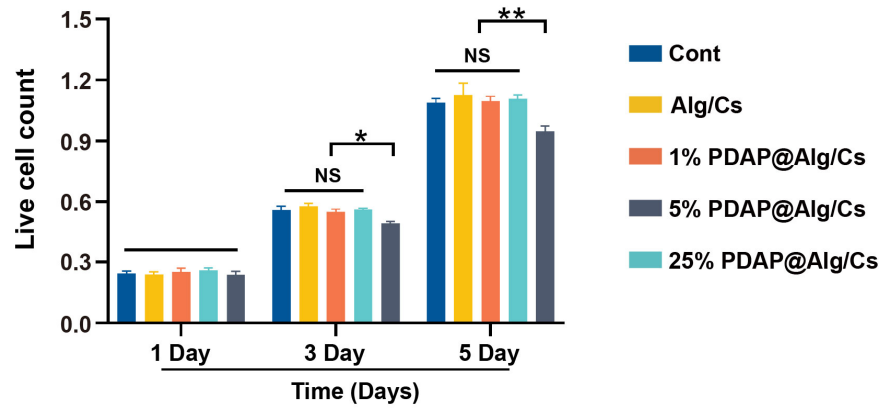

**Fig. S8.** Live cell count acquired from the Live/Dead staining assay (n=3).

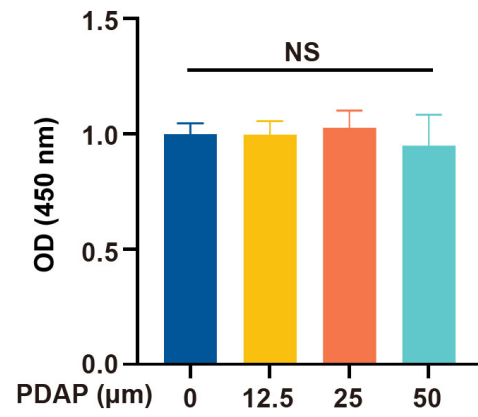

**Fig. S9.** CCK-8 assay detected the effect of different concentrations of PDAP NPs on HUVECs viability (n=5).

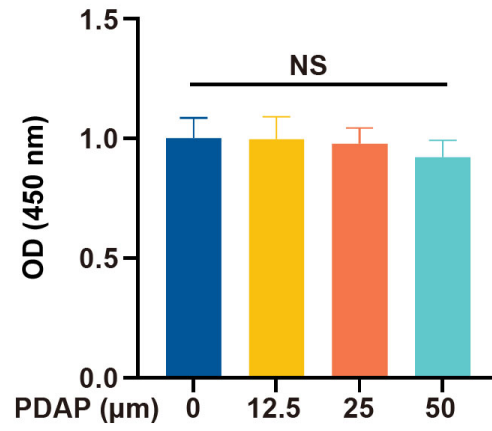

**Fig. S10.** CCK-8 assay detected the effect of different concentrations of PDAP NPs on BMMs viability (n=5).

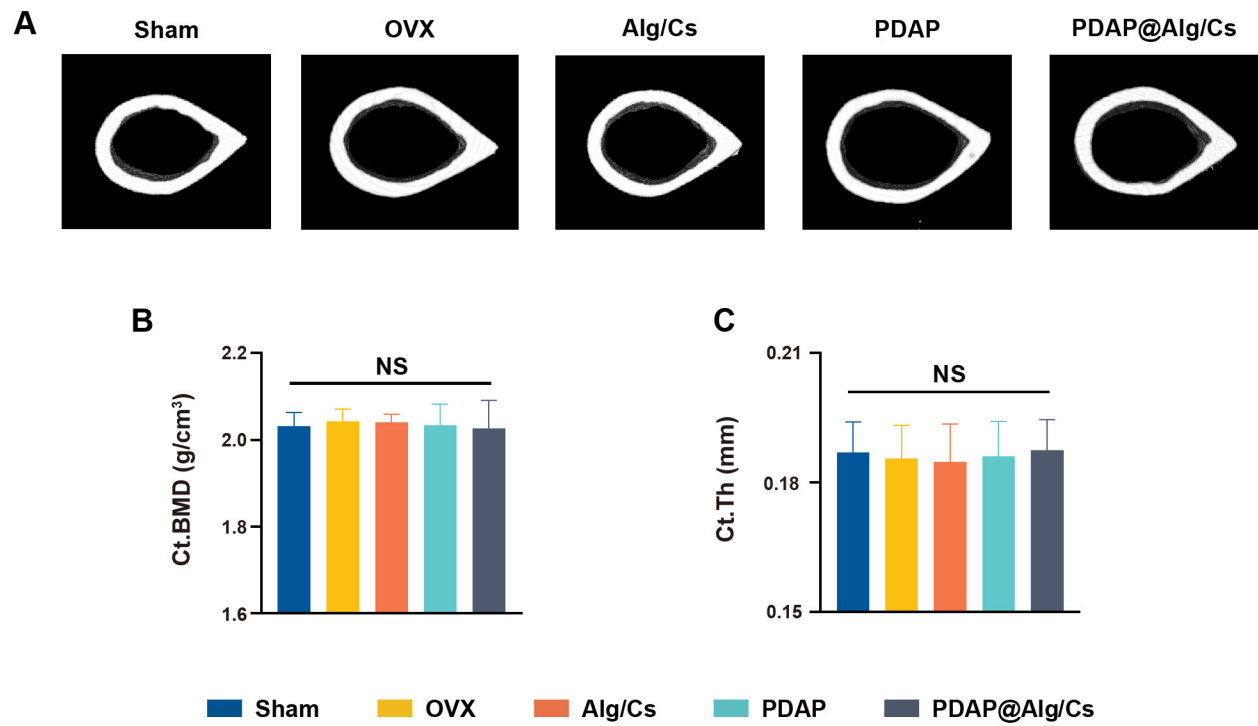

**Fig. S11.** (A) Representative micro-CT images of the cortical bone of the middle femur in Sham, OVX, Alg/Cs, PDAP, and PDAP@Alg/Cs group. (B) Ct. BMD and (C) Ct. Th of the cortical bone of the middle femur in different groups (n=6).

A

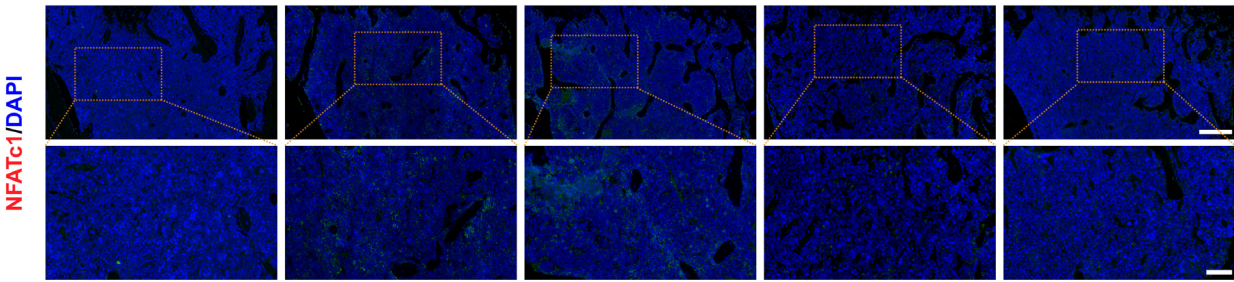

B

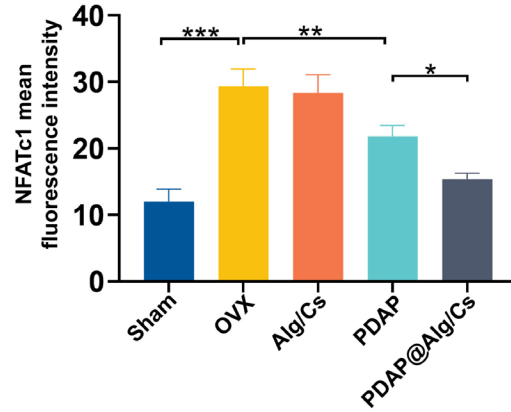

**Fig. S12.** (A) Immunofluorescence staining of NFATc1 in the distal femur. Scale bars, 200  $\mu\text{m}$  and 50  $\mu\text{m}$  for top and bottom images, respectively. (B) Quantification of the NFATc1 mean fluorescence intensity in different groups (n=6).



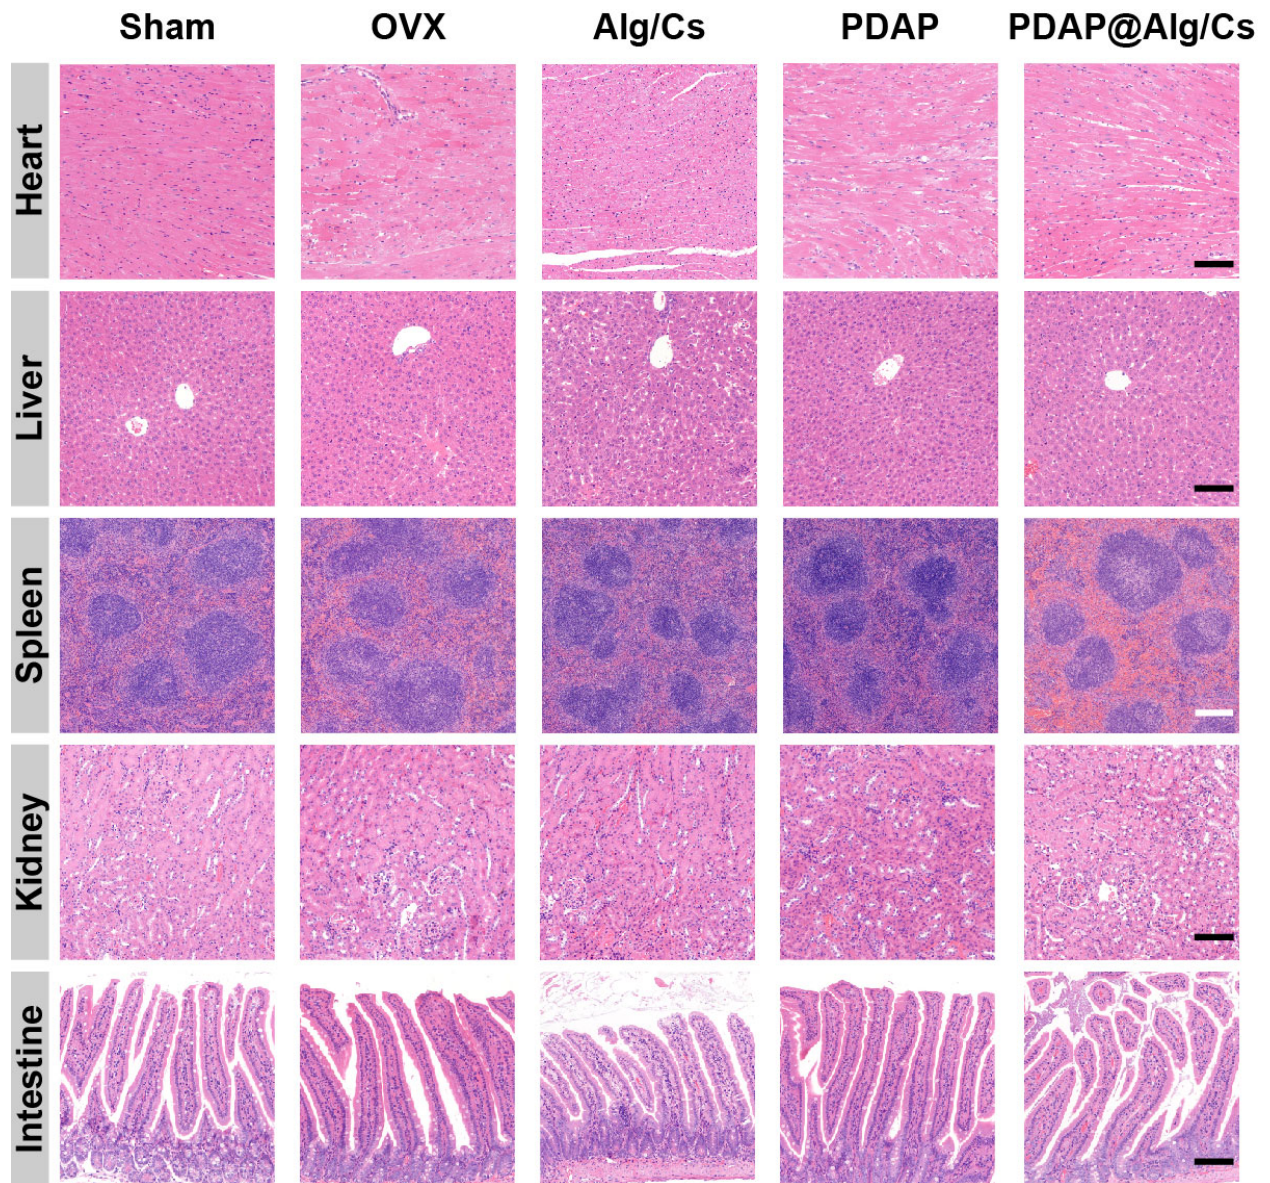

**Fig. S13.** Representative H&E images of heart, liver, spleen, kidney, and intestine sections in different groups. Scale bars, 100  $\mu$ m and 200  $\mu$ m for black and white bars, respectively.

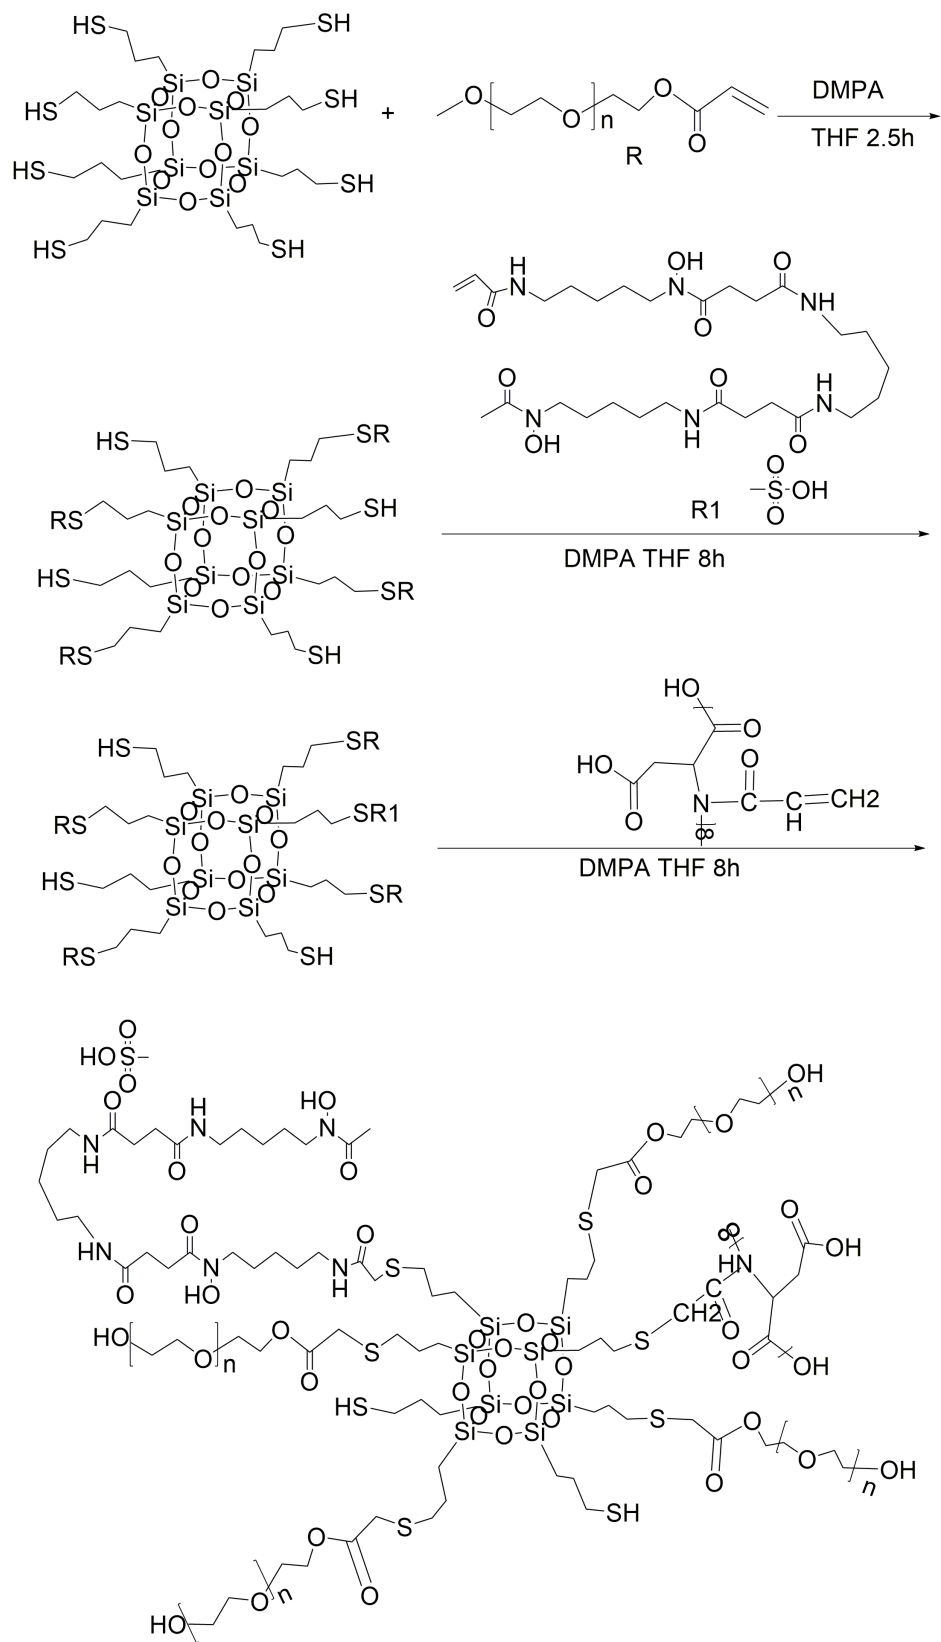

**Fig. S14.** Schematic synthesis of PDAP NPs.



**Table S1.** Sequences of primers used for the real-time quantitative PCR analysis.

| Primers                               | Forward                      | Reverse                       |
|---------------------------------------|------------------------------|-------------------------------|
| Mouse <i>Trap</i>                     | 5'-TACCTGTGTGGACATGACC-3'    | 5'- CAGATCCATAGTGAAACCGC-3'   |
| Mouse <i>Ctsk</i>                     | 5'-GAAGAAGACTCACCAGAAGCAG-3' | 5'-TCCAGGTTATGGGCAGAGATT-3'   |
| Mouse <i>Nfatc1</i>                   | 5'-GACCCGGAGTTCGACTTCG-3'    | 5'-TGACACTAGGGGACACATAACTG-3' |
| Mouse <i>Ho-1</i>                     | 5'-AAGCCGAGAATGCTGAGTTCA-3'  | 5'-GCCGTGTAGATATGGTACAAGGA-3' |
| Mouse $\beta$ -actin                  | 5'-GGCTGTATTCCCCTCCATCG-3'   | 5'- CCAGTTGGTAACAATGCCATGT-3' |
| Human <i>VEGF</i>                     | 5'-AGGGCAGAATCATCACGAAGT-3'  | 5'-AGGGTCTCGATTGGATGGCA-3'    |
| Human <i>HIF-1<math>\alpha</math></i> | 5'-CCATGTGACCATGAGGAAAT-3'   | 5'-CGGCTAGTTAGGGTACACTT-3'    |
| Human $\beta$ -ACTIN                  | 5'-CATGTACGTTGCTATCCAGGC-3'  | 5'-CTCCTTAATGTCACGCACGAT-3'   |
